# Supplementary material for: Contribution of the Transcription Factors Sp1/Sp3 and AP-1 to Clusterin Gene Expression during Corneal Wound Healing of Tissue-Engineered Human Corneas
Source: MDPI journal article supplement (doi:10.3390/ijms222212426), 2021-11-17
Supplement: s1 [file s1]

## SUPPLEMENTARY MATERIAL

### Supplementary Methods

#### *Plasmid constructs*

A 2 kb fragment bearing the 5' flanking sequence of the human CLU gene (from position -2000 to +1 relative to the theoretical mRNA start site) was synthesized and cloned by TOP Gene Technologies Inc. (St-Laurent, Québec, Canada) upstream of the CAT reporter gene into the pCATBasic vector (Promega, Madison, WI, USA). Derivatives from the -2000/CLU construct bearing various deletions of the CLU promoter were then produced by single restriction enzyme digestion of the parental plasmid. Each restriction enzyme has a first recognition site located 5' into the multiple cloning site (MCS) of pCATBasic and cuts a second time in the -2000/CLU sequence (BssHII (cuts at position -82), SacII (cuts at -203), NotI (cuts at -334), SwaI (cuts at -503), BstXI (cuts at -748), BglII (cuts at -917), AvrII (cuts at -1424) and SacI (cuts at -1737)). The restriction site overhangs of the double-digested plasmids were then ligated using T4 DNA ligase (New England Biolabs). All recombinant CLU/CAT plasmids therefore share the same 3' end (at position +82) but different 5' termini (5' positions: -2000, -1737, -1424, -917, -748, -503, -334 -203, -82).

# Supplementary tables

**Supplementary Table S1.** Oligonucleotides used as labeled probes or competitors in the EMSAs

| Oligonucleotide           | Top strand (5'-3')                                                                                                 |
|---------------------------|--------------------------------------------------------------------------------------------------------------------|
|                           | Bottom strand (5'-3')                                                                                              |
| AP1                       | GATCCCCGCGTTGAGTCATTCGCCTC<br>GATCGAGGCGAATGACTCAACGCGGG                                                           |
| Sp1/3                     | GATCATATCTGCGGGGCGGGGCAGAC<br>GATCCTGTGTCTGCCCCGCCCCGCAG                                                           |
| NFI                       | TTATTTTGGATTGAAGCCAATATGAG<br>CTCATATTGGCTTCAATCCAAAATAA                                                           |
| CLU -203/-153             | GATCCGGCATTCTTTGGGCGTGAGTCATGCAGGTTTGCAGCCAGCCCCAAAGGGG<br>GATCCCCCCTTTGGGGCTGGCTGCAAACCTGCATGACTCACGCCCAAAGAATGCC |
| CLU -203/-153<br>Mutant 1 | GATCCGGCATTCTTTGGGCGTGAGTCATGCAGGTTTGCATTAGTTTCAAAGGGG<br>GATCCCCCCTTTGAAACTAAATGCAAACCTGCATGACTCACGCCCAAAGAATGCC  |
| CLU -203/-153<br>Mutant 2 | GATCCGGCATTCTTTTTTTTGTAGTCATGCAGGTTTGCAGCCAGCCCCAAAGGGG<br>GATCCCCCCTTTGGGGCTGGCTGCAAACCTGCATGACTCAAAAAAAAAGAATGCC |

**Supplementary Table S2.** TFSEARCH analysis on the CLU -1424/-2000 promoter segment

seq\_CLU -1424/-2000

| Name                              | Sequence                      | Position | Strand | Score | p-value  | E-value |
|-----------------------------------|-------------------------------|----------|--------|-------|----------|---------|
| FOXJ2(M00422)                     | TACTAAGCAAACAAGGTT            | -1992    | -      | 9.42  | 0.000275 | 0.068   |
| HNF-3beta(M00131)                 | CCTTGTTTGCTTA                 | -1990    | +      | 16.94 | 0        | 0       |
| HFH-8(M00294)                     | CCTTGTTTGCTTA                 | -1990    | +      | 9.57  | 0.000325 | 0.082   |
| HFH-3(M00289)                     | CCTTGTTTGCTTA                 | -1990    | +      | 10.5  | 0.000175 | 0.044   |
| FOXD3(M00130)                     | CCTTGTTTGCTT                  | -1990    | +      | 8.09  | 0.000475 | 0.120   |
| Ik-3(M00088)                      | TAGTGGGAATAAT                 | -1976    | +      | 10.81 | 0.0001   | 0.0251  |
| Ik-1(M00086)                      | TAGTGGGAATAAT                 | -1976    | +      | 9.95  | 0.00015  | 0.038   |
| AhR:Arnt(M00237)                  | AATAATTACTTGATTATTC           | -1970    | -      | 1     | 0.000975 | 0.239   |
| Nkx2-5(M00240)                    | TCAAGTA                       | -1964    | +      | 9.02  | 0.000875 | 0.225   |
| Olf-1(M00261)                     | AATTATTCCCAAGGGATCACAG        | -1958    | +      | 9.57  | 0.000225 | 0.054   |
| Ik-3(M00088)                      | CCTTGGGAATAAT                 | -1957    | -      | 6.92  | 0.00095  | 0.238   |
| Ik-1(M00086)                      | CCTTGGGAATAAT                 | -1957    | -      | 12.55 | 0        | 0       |
| Ik-1(M00086)                      | CCTTGGGAATAA                  | -1956    | -      | 8.32  | 0.000625 | 0.157   |
| Ik-2(M00087)                      | CCTTGGGAATAA                  | -1956    | -      | 10.77 | 0.000125 | 0.0315  |
| ARP-1(M00155)                     | TGATCCCTTGGGAATA              | -1955    | -      | 10.15 | 5.0E-5   | 0.0124  |
| Poly A downstream element(M00211) | TGTGATCCC                     | -1946    | -      | 9.92  | 7.5E-5   | 0.0191  |
| SEF-1(M00214)                     | CACAGTCATGACTGTGATC           | -1944    | -      | 6.51  | 0.000325 | 0.080   |
| TCF11:MafG(M00284)                | CAGTCATGACTGTGAATCTGT         | -1939    | +      | 11.59 | 0.000625 | 0.151   |
| Pax-4(M00380)                     | AAAATAGCATGATTCACAGATTCACAGT  | -1931    | -      | 18.34 | 0.000125 | 0.0293  |
| Pax-4(M00380)                     | AGAAAATAGCATGATTCACAGATTCACAG | -1930    | -      | 16.06 | 0.000825 | 0.193   |
| MEIS1B:HOXA9(M00421)              | TCACAGATTCACAG                | -1930    | -      | 9.02  | 0.000425 | 0.106   |
| AREB6(M00414)                     | GTGAATCTGTGA                  | -1928    | +      | 7.69  | 0.00095  | 0.239   |
| ARP-1(M00155)                     | TGAATCTGTGAATCAT              | -1927    | +      | 6.3   | 0.000825 | 0.205   |
| Bach1(M00495)                     | TCTGTGAATCATGCT               | -1923    | +      | 8.64  | 0.000175 | 0.044   |
| Bach1(M00495)                     | CTGTGAATCATGCT                | -1922    | +      | 5.55  | 0.00085  | 0.212   |
| AP-1(M00517)                      | GCATGATTCACAG                 | -1922    | -      | 8.56  | 0.000575 | 0.144   |
| AP-1(M00199)                      | GTGAATCA                      | -1920    | +      | 12.15 | 0.000525 | 0.134   |
| Xvent-1(M00445)                   | ATGCTATTTTC                   | -1913    | +      | 13.49 | 0.000875 | 0.220   |
| Lyf-1(M00141)                     | CTTGGGAGA                     | -1904    | -      | 9.63  | 0.0001   | 0.0255  |
| Nkx2-2(M00485)                    | CAAGTCCTT                     | -1899    | +      | 15.77 | 0        | 0       |
| STATx(M00223)                     | TTCCCTAA                      | -1875    | +      | 10.58 | 0.000175 | 0.045   |
| MyoD(M00184)                      | TTCAGCTGGC                    | -1866    | +      | 8.13  | 0.0007   | 0.178   |
| AP-4(M00176)                      | TTCAGCTGGC                    | -1866    | +      | 8.52  | 0.000575 | 0.146   |
| AP-4(M00176)                      | TCAGCTGGC                     | -1865    | +      | 8.52  | 0.000575 | 0.146   |
| CP2(M00072)                       | GCCTTAGCCAG                   | -1861    | -      | 8.21  | 0.0007   | 0.177   |
| GC box(M00255)                    | CTAAGGCGGATCTC                | -1857    | +      | 9.19  | 0.00025  | 0.063   |

|                         |                               |       |   |       |          |        |
|-------------------------|-------------------------------|-------|---|-------|----------|--------|
| Sp1(M00196)             | CTAAGGCGGATCT                 | -1857 | + | 8.39  | 0.000275 | 0.069  |
| Elk-1(M00007)           | TAAGGCGGATCTCACT              | -1856 | + | 8.73  | 0.00035  | 0.087  |
| AP-2rep(M00468)         | CAGTGAG                       | -1846 | - | 6.45  | 0.00095  | 0.244  |
| AP-1(M00517)            | AGGTCAGTCAGTG                 | -1844 | - | 7.73  | 0.00095  | 0.238  |
| NF-E2(M00037)           | CACTGACTGAC                   | -1844 | + | 8.27  | 0.000775 | 0.196  |
| AP-1(M00172)            | ACTGACTGACC                   | -1843 | + | 8.57  | 0.0009   | 0.228  |
| AP-1(M00174)            | ACTGACTGACC                   | -1843 | + | 9.34  | 0.000425 | 0.108  |
| AP-1(M00173)            | ACTGACTGACC                   | -1843 | + | 8.46  | 0.000925 | 0.234  |
| AP-1(M00188)            | ACTGACTGACC                   | -1843 | + | 10.35 | 0.0001   | 0.0253 |
| RORalpha1(M00156)       | CTTTGGAGGTCA                  | -1837 | - | 15.01 | 0.0001   | 0.0251 |
| Evi-1(M00081)           | AAATATAACTAGATT               | -1813 | + | 7.83  | 0.00075  | 0.187  |
| Freac-7(M00293)         | AAGGCATAAACTAGT               | -1806 | - | 8.35  | 0.00085  | 0.211  |
| TBP(M00471)             | CATAAATC                      | -1802 | - | 8.2   | 0        | 0      |
| Sp1(M00008)             | AAGGCATAAA                    | -1800 | - | 7.72  | 0.0002   | 0.051  |
| Tal-1beta:ITF-2(M00070) | CGGAACAGAAGGCATA              | -1798 | - | 7.83  | 0.0002   | 0.050  |
| NRSF(M00256)            | CTCAGCATCCGGAACAGAAGG         | -1794 | - | -1.73 | 0.000725 | 0.176  |
| NRSF(M00256)            | CTCAGCATCCGGAACAGAAG          | -1793 | - | -1.73 | 0.000725 | 0.176  |
| Elk-1(M00025)           | TGTTCCGGATGCTG                | -1789 | + | 9.78  | 0.000275 | 0.069  |
| AP-2(M00189)            | GTTCCGGATGCT                  | -1788 | + | 8.07  | 0.00045  | 0.113  |
| c-Ets-1(p54)(M00074)    | TTCCGGATGCTG                  | -1787 | + | 12.8  | 0.00095  | 0.238  |
| c-Ets-1(p54)(M00074)    | TCCGGATGCTG                   | -1786 | + | 13.52 | 0.000275 | 0.069  |
| RP58(M00532)            | TCAGCATCCGGA                  | -1786 | - | 5.26  | 0.000675 | 0.170  |
| c-Ets-1(p54)(M00032)    | TCCGGATGCT                    | -1786 | + | 11.57 | 5.0E-5   | 0.0127 |
| c-Ets-1(p54)(M00074)    | CCGGATGCTG                    | -1785 | + | 13.92 | 0.000125 | 0.0314 |
| NRSF(M00256)            | TTCTGTAGCTCCCTCAGCATC         | -1782 | - | -0.63 | 0.00045  | 0.109  |
| myogenin / NF-1(M00056) | AACTTTTCTGTTCTGTAGCTCCCTCAGCA | -1780 | - | 6.45  | 0.000675 | 0.159  |
| E2(M00107)              | AGAACAGAAAAGTTAC              | -1765 | + | 7.54  | 0.00095  | 0.236  |
| VBP(M00228)             | GTTACA                        | -1754 | + | 15.31 | 0.000675 | 0.171  |
| Sox-5(M00042)           | AACAATTC                      | -1733 | + | 12.75 | 0.00085  | 0.258  |
| MyoD(M00001)            | CCTCAGGTATTG                  | -1719 | + | 8.96  | 0.000425 | 0.128  |
| SOX-9(M00410)           | CCTTATCAATACCT                | -1715 | - | 8.17  | 0.0008   | 0.240  |
| GATA-2(M00348)          | ATTGATAAAGG                   | -1711 | + | 9.25  | 0.0005   | 0.152  |
| GATA-1(M00347)          | ATTGATAAAGG                   | -1711 | + | 10.02 | 0.000225 | 0.068  |
| Lmo2 complex(M00278)    | TGATAAAGG                     | -1709 | + | 11.88 | 0.000875 | 0.267  |
| GATA-6(M00462)          | ACTGATAAAGG                   | -1694 | + | 8.18  | 0.000425 | 0.129  |
| GATA-2(M00348)          | ACTGATAAAGG                   | -1694 | + | 10.37 | 2.5E-5   | 0.0076 |
| GATA-1(M00347)          | ACTGATAAAGG                   | -1694 | + | 9.9   | 0.00025  | 0.076  |
| GATA-1(M00346)          | ACTGATAAAGG                   | -1694 | + | 9.5   | 0.000275 | 0.084  |
| GATA-1(M00128)          | ACTGATAAAGGAG                 | -1694 | + | 14.32 | 0.000125 | 0.038  |

|                       |                              |       |   |       |          |        |
|-----------------------|------------------------------|-------|---|-------|----------|--------|
| GATA-3(M00077)        | CTGATAAGG                    | -1693 | + | 7.72  | 0.000975 | 0.297  |
| Lmo2 complex(M00278)  | TGATAAGG                     | -1692 | + | 11.88 | 0.000875 | 0.267  |
| GR(M00192)            | GGAGCAGGCACTGTCCACA          | -1686 | + | 9.6   | 0.000275 | 0.081  |
| Sp1(M00008)           | CAGGCACTGT                   | -1682 | + | 6.89  | 0.0008   | 0.243  |
| C/EBP(M00159)         | TCTGTGGACAGTG                | -1678 | - | 7.71  | 0.000875 | 0.263  |
| Msx-1(M00394)         | CAGAAAATG                    | -1669 | + | 7.24  | 0.0007   | 0.213  |
| ISRE(M00258)          | CAGCTACATTTTCTG              | -1669 | - | 6.2   | 0.001    | 0.299  |
| BSAP(M00143)          | TTTAAGAAAAATAAAGTGTAGCCTCTTC | -1630 | + | 7.44  | 0.00085  | 0.243  |
| Olf-1(M00261)         | AAAATGTCCCAGAAGAGGCTAC       | -1613 | - | 12.27 | 5.0E-5   | 0.0146 |
| Olf-1(M00261)         | AAAATGTCCCAGAAGAGGCTA        | -1612 | - | 9.21  | 0.00035  | 0.102  |
| STATx(M00223)         | TCCCAGAA                     | -1605 | - | 7.55  | 0.000825 | 0.252  |
| GR(M00192)            | GAAGAAAAAATGTCCCAG           | -1603 | - | 10.61 | 0.0001   | 0.0295 |
| SRY(M00148)           | AATGTCC                      | -1600 | - | 6.04  | 0.0001   | 0.0307 |
| YY1(M00069)           | AGAAGGCCATTAACCCAGAA         | -1584 | - | 8.38  | 0.000675 | 0.198  |
| PPAR(M00528)          | TTCTGGGTAAATGGCCT            | -1584 | + | 10.84 | 0.000125 | 0.037  |
| YY1(M00059)           | GAAGGCCATTAACCCAG            | -1582 | - | 8.76  | 0.00035  | 0.104  |
| NF-1(M00193)          | ACTTGGCTTGGCTCTAGG           | -1561 | + | 9.07  | 0.000475 | 0.141  |
| NF-1(M00193)          | GCTTGGCTCTAGGTTAGG           | -1556 | + | 8.33  | 0.00075  | 0.222  |
| ZID(M00085)           | TGGCTCTAGGTTA                | -1553 | + | 12.07 | 2.5E-5   | 0.0075 |
| ZID(M00085)           | GGCTCTAGGTTA                 | -1552 | + | 6.66  | 0.000875 | 0.263  |
| STAT1(M00224)         | GATCCATTCCCG                 | -1518 | + | 11.73 | 0.000625 | 0.183  |
| Ik-1(M00086)          | AATCGGGAATGGA                | -1516 | - | 8.25  | 0.00065  | 0.196  |
| GATA-6(M00462)        | CCCGATTCCT                   | -1510 | + | 8.31  | 0.00025  | 0.076  |
| GATA-1(M00075)        | CCCGATTC                     | -1510 | + | 12.53 | 0.000475 | 0.144  |
| AP-1(M00517)          | CGATTCCTCATCG                | -1508 | + | 8.19  | 0.000725 | 0.218  |
| Tal-1beta:E47(M00065) | TCGTCCAGATGGAAGA             | -1498 | + | 8.71  | 0.000225 | 0.067  |
| GATA-1(M00075)        | CCAGATGG                     | -1494 | + | 12.03 | 0.001    | 0.304  |
| NF-E2(M00037)         | AACTGAGGCC                   | -1482 | + | 9.12  | 0.000525 | 0.159  |
| PPARG(M00512)         | ACTGAGGCCCAAGGGCA            | -1481 | + | 8.24  | 0.000525 | 0.154  |
| GCNF(M00526)          | CTGAGGCCCAAGGGCAAA           | -1480 | + | 3.29  | 0.000775 | 0.229  |
| HNF-4alpha1(M00411)   | GAGGCCCAAGGGCA               | -1478 | + | 10.39 | 0.000525 | 0.157  |
| PPARG(M00515)         | CACTGGGTGACCTCGGACTA         | -1457 | - | 8.74  | 0.000925 | 0.269  |
| RORalpha1(M00156)     | AGTCCGAGGTCA                 | -1456 | + | 13.66 | 0.000225 | 0.068  |
| v-ErbA(M00239)        | GTCCGAGGTCACCCAG             | -1455 | + | 9.3   | 0.0004   | 0.119  |
| CREB(M00039)          | TGACCTCG                     | -1452 | - | 7.68  | 0.000925 | 0.283  |
| Zic3(M00450)          | TGGGTGACC                    | -1449 | - | 7.55  | 0.000275 | 0.084  |
| MZF1(M00084)          | TGTCTAGGGGCAC                | -1439 | + | 12.42 | 0        | 0      |
| MZF1(M00084)          | GTCTAGGGGCAC                 | -1438 | + | 7.3   | 0.000775 | 0.233  |

**Supplementary Figure S1.** Expression of transcription factors identified in the CLU -1424/-2000 distal silencer

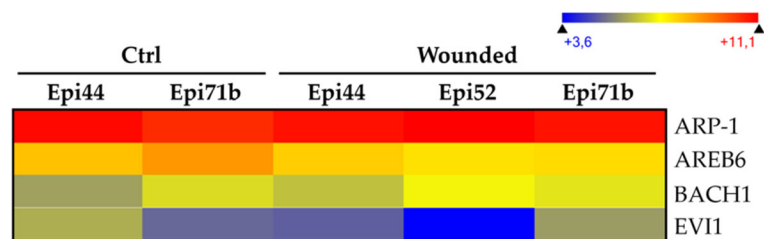

Heatmap representation of the transcriptional profiles of the TFs ARP-1, AREB6, BACH1 and EVI1 identified in the TFSEARCH analysis realized on the CLU -1424/-2000 segment, in centrally wounded relative to unwounded (negative control; Ctrl) hTECs. The color scale used to display the log2 expression level values is determined by the Hierarchical clustering algorithm of the Euclidian metric distance between genes. Genes indicated in dark blue correspond to those whose expression is very low whereas highly expressed genes are shown in orange/red.
